# Supplementary material for: Internalization pathways of nanoparticles and their interaction with a vesicle
Source: Royal Society of Chemistry journal article supplement (doi:10.1039/c3sm50931a), 2013-01-01
Supplement: c3sm50931a.pdf [file c3sm50931a.pdf]

## Supplementary Information

### Internalization pathways of nanoparticles and their interaction with a vesicle

Xiaoming Chen, Falin Tian, Xianren Zhang and Wenchuan Wang

*Division of Molecular and Materials Simulation, State Key Laboratory of Organic-Inorganic Composites, Beijing University of Chemical Technology, Beijing 100029, China.*

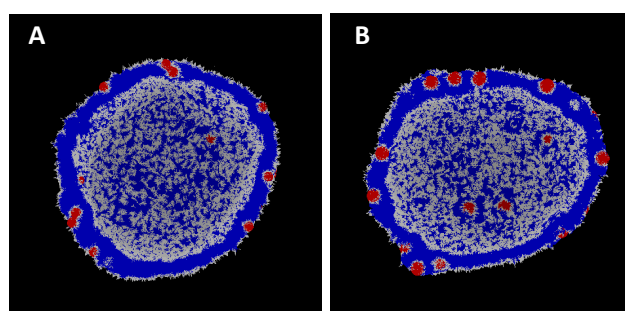

**Figure S1** Pathways of NP penetration into a spherical vesicle of 37 nm with a lipid model of  $\text{H}_3(\text{T}_5)_2$ . (A) The pathway of cooperative chain-like penetration for 160 NPs of 2.0 nm; (B) Direct penetration for 96 NPs of 3.5 nm.

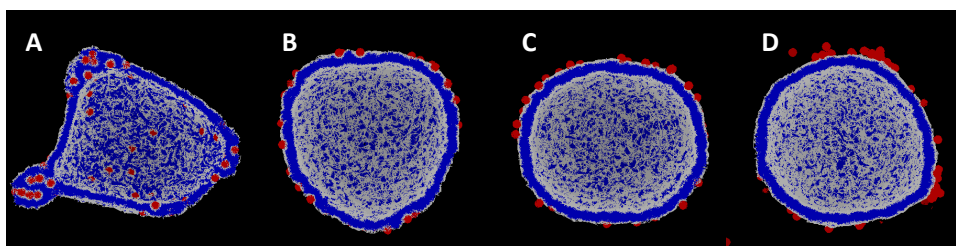

**Figure S2** Effect of NP–lipid head attraction on the pathways of NP penetration. The strength of attraction between NP and lipid head decreases from  $a_{ph}=0$  (A) , 5.0 (B), 10.0 (C) to 15.0 (D). For the snapshots, the diameter of the spherical vesicle is set to 60 nm, and 160 NPs of 3.0nm are initially adsorbed on the vesicle surface.

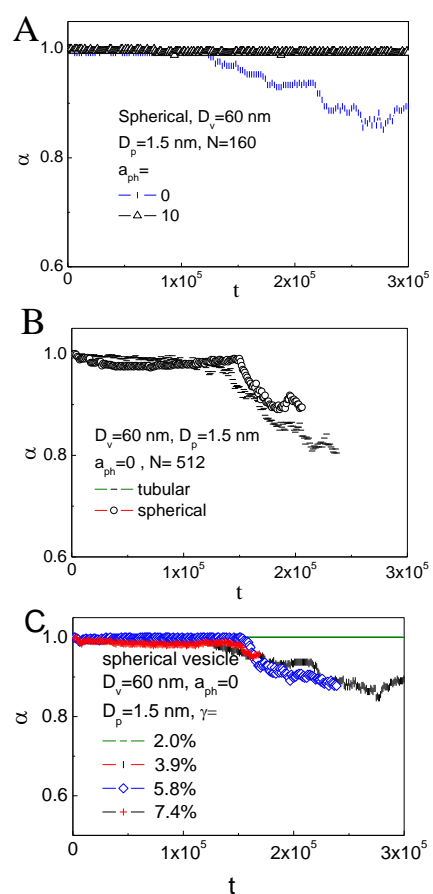

**Figure S3** penetration ratio as a function of (A) NP-lipid head attraction, (B) vesicle type, and (C) NP concentration.

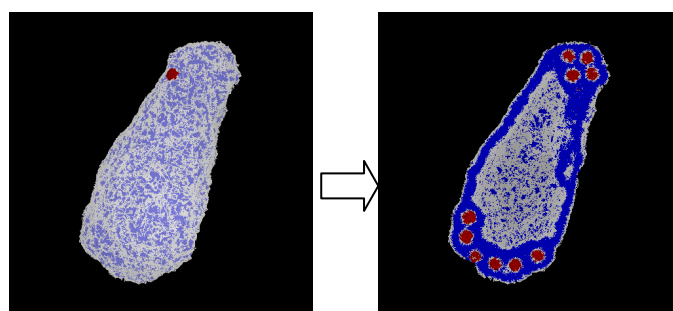

**Figure S4** The formation of two protuberances for a tubular vesicle. For the system, 32 NPs of 4.5 nm are adsorbed initially on the surface of the tubular vesicle of 60 nm.
